# Supplementary material for: Association of Extreme Heat Events With Hospital Admission or Mortality Among Patients With End-Stage Renal Disease
Source: PubMed Central journal article supplement (PMC6692691; doi:10.1001/jamanetworkopen.2019.8904), 2019-08-09

## Supplementary Online Content

Remigio RV, Jiang C, Raimann J, et al. Association of extreme heat events with hospital admission or mortality among patients with end-stage renal disease. *JAMA Netw Open*. 2019;2(8):e198904. doi:10.1001/jamanetworkopen.2019.8904

**eFigure.** Yearly Total Extreme Heat Events in May Through September by City

This supplementary material has been provided by the authors to give readers additional information about their work.

eFigure. Yearly Total Extreme Heat Events in May Through September by City

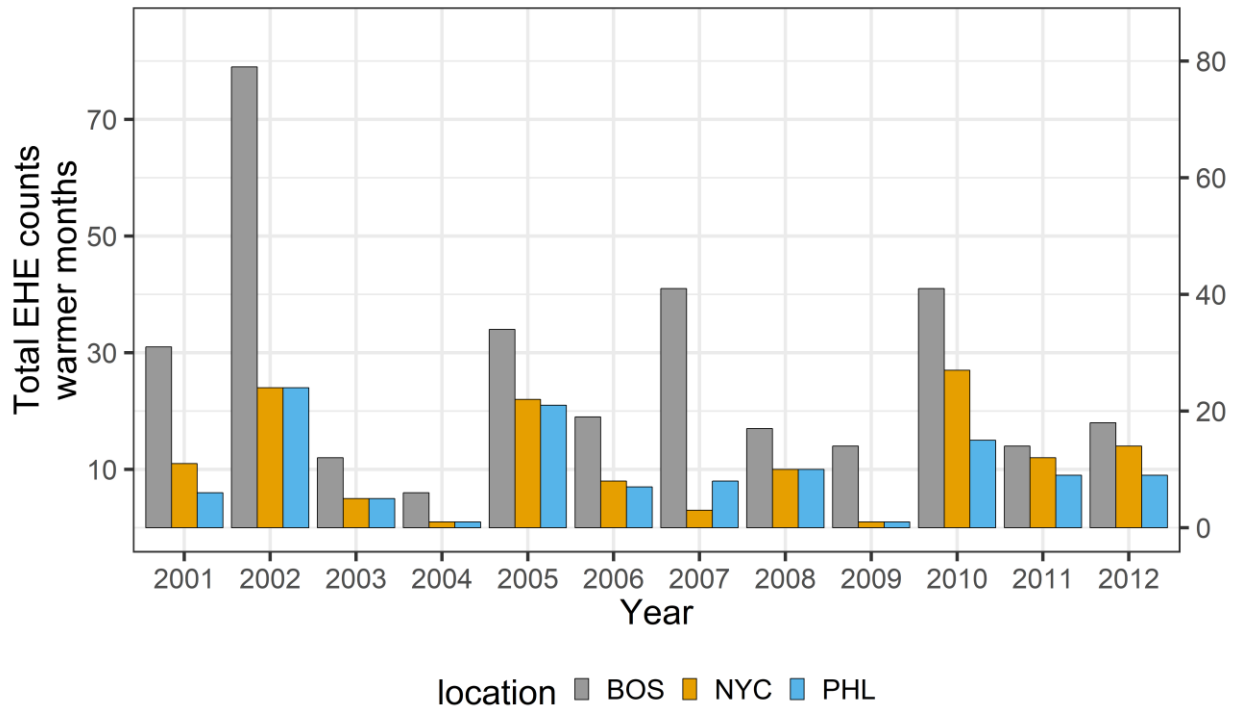

Supplement: jamanetwopen-2-e198904-s001.pdf [file jamanetwopen-2-e198904-s001.pdf]
